# Supplementary material for: An integrative review of physical activity in adults with inflammatory bowel disease
Source: PubMed Central journal article supplement — Intest Res. 2021 Jan 22;20(1):43–52. doi: 10.5217/ir.2020.00049 (PMC8831770; doi:10.5217/ir.2020.00049), 2021-01-22
Supplement: ir-2020-00049-suppl.pdf [file ir-2020-00049-suppl.pdf]

See “An integrative review of physical activity in adults with inflammatory bowel disease” on page 43-52.

Supplementary Table 1. Details of the Reviewed Articles

| Author (year)                        | Study type            | Sample & settings                                                                                                                   | Country     | Methods                                                                                                                                                                                                                                                                                                                           | Main findings                                                                                                                                                                                                                                                                                                                                                                                       |
|--------------------------------------|-----------------------|-------------------------------------------------------------------------------------------------------------------------------------|-------------|-----------------------------------------------------------------------------------------------------------------------------------------------------------------------------------------------------------------------------------------------------------------------------------------------------------------------------------|-----------------------------------------------------------------------------------------------------------------------------------------------------------------------------------------------------------------------------------------------------------------------------------------------------------------------------------------------------------------------------------------------------|
| Artom et al. (2017) <sup>14</sup>    | Cross-sectional study | Adults with IBD (n = 182) (active disease = 45, remission = 128 in those without ostomy)                                            | UK          | Exercise was measured as < 30 or > 30 minutes of aerobic exercise per week. Fatigue was measured using IBD-F.                                                                                                                                                                                                                     | 64% participated in aerobic exercise > 30 minutes/week<br>↑ Levels of fatigue in those who engaged in < 30 minutes of aerobic exercise per week (P=0.01).                                                                                                                                                                                                                                           |
| Aluzaitė et al. (2019) <sup>15</sup> | Cross-sectional study | Adults with IBD (n = 113) (active disease = 70, remission = 43)                                                                     | New Zealand | PA was measured using IPAQ. Fatigue was measured using BFI and MFI.                                                                                                                                                                                                                                                               | 51% of participants engaged in moderate levels of PA and 35% engaged in high levels of PA<br>Physical (P=0.04) and mental (P=0.006) fatigue lowered with ↑ PA.                                                                                                                                                                                                                                      |
| Cabalzar et al. (2019) <sup>37</sup> | Case control study    | CD patients (CD cases = 26, control = 20)<br>All participants with moderate to severe disease in clinical remission with infliximab | Brazil      | Each participant wore a triaxial accelerometer around the waist for 12 hours/day during waking hours for 4 consecutive days to determine PA. The Baecke questionnaire was used to measure PA. Peripheral muscle strength was assessed by handgrip strength using a hydraulic dynamometer. QOL was evaluated using SF-36 and IBDQ. | No difference found between participants with CD and controls in terms of physical activity.<br>No association found between physical activity and QOL.                                                                                                                                                                                                                                             |
| Chae et al. (2016) <sup>16</sup>     | Descriptive study     | CD = 59, UC = 61<br>Statistics on disease activity were not reported.                                                               | South Korea | Exercise was measured using GLTQ and attitudes toward exercise were measured using a different questionnaire.                                                                                                                                                                                                                     | Adults with IBD participated in mild form of exercise: 103 minutes of exercise per week.<br>The majority reported that exercise is beneficial (80.5%) and pleasant (57.7%), and preferred more information (76.5%) on exercise programs.                                                                                                                                                            |
| Chan et al. (2014) <sup>17</sup>     | Descriptive study     | UC = 422, CD = 496<br>Statistics on disease activity were not reported.                                                             | UK          | A sport and fitness survey was used to elicit responses on exercise habits, fitness levels, barriers to exercise, and the influence of IBD on exercise.                                                                                                                                                                           | 32% were exercising daily.<br>50% reported that IBD influenced their fitness.<br>Participants reported benefits of exercise, such as improvement in general well-being, energy, sleep, and ability to manage IBD symptoms and weight control.<br>Lack of time, fatigue, constraints regarding toilet access, health concerns, pain, and financial constraints were reported as barriers to fatigue. |

(Continued to the next page)

Supplementary Table 1. Continued

| Author (year)                          | Study type                              | Sample & settings                                                                                                                         | Country                                    | Methods                                                                                                                                                                                                                                                                                                                                                                                                                                                                                                  | Main findings                                                                                                                                                                                                                                                                                                                                                                                                                                                                                                                    |
|----------------------------------------|-----------------------------------------|-------------------------------------------------------------------------------------------------------------------------------------------|--------------------------------------------|----------------------------------------------------------------------------------------------------------------------------------------------------------------------------------------------------------------------------------------------------------------------------------------------------------------------------------------------------------------------------------------------------------------------------------------------------------------------------------------------------------|----------------------------------------------------------------------------------------------------------------------------------------------------------------------------------------------------------------------------------------------------------------------------------------------------------------------------------------------------------------------------------------------------------------------------------------------------------------------------------------------------------------------------------|
| Cronin et al. (2019) <sup>32</sup>     | Randomized cross over trial for 8 weeks | Exercise group = 13, control group = 7 IBD patients in remission                                                                          | Ireland                                    | Subjects in the exercise group participated in a combination of moderate intensity aerobic and resistance exercise program X 8 weeks under the supervision of a gym instructor.<br>Primary outcomes: body composition (fat mass, bone mass, and lean tissue), measured by DEXA, and cardio respiratory fitness, measured by VO <sub>2</sub> max.<br>Secondary outcomes: disease activity scores, QOL, anxiety and depression scores, cytokine profiles, CRP levels, and gut microbiome diversity levels. | Participants in the exercise program had positive body composition changes: ↓ total body fat % ( $P=0.022$ ) and ↑ in total lean tissue mass compared to non-exercise group ( $P=0.003$ ).<br>Exercise group participants had improved VO <sub>2</sub> max ( $P=0.03$ ).<br>No significant improvements in disease activity scores, QOL, anxiety and depression scores, or cytokine or CRP levels between the exercise and non-exercise participants.<br>↑ in α diversity of gut microbiome in both exercise and control groups. |
| Crumbok et al. (2008) <sup>30</sup>    | Pilot cross-sectional study             | Adults with CD (n = 17)<br>Disease activity was measured using the bowel dimensional score of IBDQ; median score was 54.7 (range, 24–66). | USA                                        | PA was measured using IPAQ, stress was measured using PSS, QOL was measured using IBDQ, and disease activity was measured using the bowel dimensional score of IBDQ.                                                                                                                                                                                                                                                                                                                                     | The majority of the participants (52.9%) were engaged in high levels of PA.<br>Direct correlation between PA and QOL ( $r=0.55$ , $P=0.02$ ).<br>No significant association was noted between stress, disease activity, and PA.                                                                                                                                                                                                                                                                                                  |
| DeFilippis et al. (2015) <sup>18</sup> | Cross-sectional study                   | CD = 140, UC = 87<br>IBD in remission                                                                                                     | USA                                        | Demographic data<br>Four questions were asked to elicit responses on exercise history, and a "talk test" was used to categorize exercise as sedentary, light, moderate, or vigorous.<br>Disease activity was measured by HBI.<br>Biomarkers: CRP and fecal calprotectin.                                                                                                                                                                                                                                 | Walking, running, weight lifting, cycling, and yoga were the most common types of exercises reported.<br>186 participants were regularly engaged in exercise, and 51% were involved in moderate intensity exercise.<br>No difference in CRP, calprotectin values & disease activity among the sedentary, light, moderate, and vigorous exercise groups.<br>Fatigue was the main reported reason for exercise limitation, followed by joint pain, embarrassment, weakness, abdominal pain, urgency, and bowel incontinence.       |
| Gatt et al. (2019) <sup>19</sup>       | Cross-sectional study                   | CD = 100, UC = 58 (diagnoses within the prior 18 months were included in the study)<br>Statistics on disease activity were not reported.  | Greece, Cyprus, Malta, Hungary, and Israel | Exercise before and after IBD diagnosis was measured using GLTQ.<br>Fatigue was measured using the FACIT scale.                                                                                                                                                                                                                                                                                                                                                                                          | Participants reported of the influence of exercise on symptom control (45.8%), ↓ in relapse rates (41.3%), and ↑ QOL (79.4%)<br>↓ GLTQ scores in both CD and UC after IBD diagnosis ( $P=0.002$ ).<br>No association between fatigue and GLTQ scores.                                                                                                                                                                                                                                                                            |
| Hlavaty et al. (2013) <sup>20</sup>    | Case control study                      | CD = 190, UC = 148, control = 355<br>Statistics on disease activity were not reported.                                                    | Slovakia                                   | Participants were asked 44 questions, such as socioeconomic status and exposure to environmental risk factors, including frequency of childhood PAs and activities at present.                                                                                                                                                                                                                                                                                                                           | The environmental risk factors that ↑ the risk of CD and UC include infrequent PA (< 2 sporting activities per week) in childhood, and history of breastfeeding < 6 months.                                                                                                                                                                                                                                                                                                                                                      |

(Continued to the next page)

Supplementary Table 1. Continued

| Author (year)                        | Study type                            | Sample & settings                                                                                | Country | Methods                                                                                                                                                                                                                                                                                                                                                                                                                                                                                                                                                                                                                                                                                | Main findings                                                                                                                                                                               |
|--------------------------------------|---------------------------------------|--------------------------------------------------------------------------------------------------|---------|----------------------------------------------------------------------------------------------------------------------------------------------------------------------------------------------------------------------------------------------------------------------------------------------------------------------------------------------------------------------------------------------------------------------------------------------------------------------------------------------------------------------------------------------------------------------------------------------------------------------------------------------------------------------------------------|---------------------------------------------------------------------------------------------------------------------------------------------------------------------------------------------|
| Holik et al. (2019) <sup>21</sup>    | Cross-sectional study                 | CD = 114, UC = 198<br>Majority of the participants (66% of CD & 60% of UC) had inactive disease. | Croatia | Three groups were elicited regarding mild (30-minute walk), moderate (bicycle ride and gardening), and intensive (hard manual work, sports) PA by self-report. Disease activity was measured by HBI for CD and by the Mayo index for UC.                                                                                                                                                                                                                                                                                                                                                                                                                                               | Overall, 85% of participants with inactive IBD and 67% of the participants with active IBD were engaged in daily PA. PA was connected to the inactive IBD status.                           |
| Jones et al. (2015) <sup>22</sup>    | Prospective study                     | CD = 1,308, UC = 549<br>Adults with IBD in remission                                             | USA     | Exercise was measured using GLTA. Disease activity was measured via SCDAI for CD and SCCAI for UC.                                                                                                                                                                                                                                                                                                                                                                                                                                                                                                                                                                                     | ↑ Exercise had protective effect on adults with CD in remission and ↓ risk of active CD ( $P=0.02$ ).                                                                                       |
| Khalili et al. (2013) <sup>23</sup>  | Prospective cohort study              | CD = 284, UC = 363<br>Statistics on disease activity were not reported.                          | USA     | Questions were asked about the average time per week engaged in PAs. A MET value was given to each activity based on previously set criteria.                                                                                                                                                                                                                                                                                                                                                                                                                                                                                                                                          | ↑ PA lowered the risk of CD (for the trend, $P=0.007$ ).                                                                                                                                    |
| Klare et al. (2015) <sup>33</sup>    | RCT                                   | Intervention = 15, control = 15<br>IBD patients in remission or mild disease activity            | Germany | The intervention group engaged in supervised moderate intensity running 3 times/week × 10 weeks. QOL was measured using IBDQ before and after the intervention. Biomarkers, such as CRP and fecal calprotectin, were measured before and after intervention.                                                                                                                                                                                                                                                                                                                                                                                                                           | Improvement in QOL scores in the participants of the running program compared to the controls ( $P=0.001$ ). No difference in biomarkers noted between the intervention and control groups. |
| Lykouras et al. (2017) <sup>34</sup> | Pilot study                           | 10 Adults with inactive IBD, 8 adults with active IBD                                            | Greece  | Spirometry, lung diffusion capacity, CPET, VO <sub>2</sub> max, and VCO <sub>2</sub> max were measured between the 2 groups.                                                                                                                                                                                                                                                                                                                                                                                                                                                                                                                                                           | No difference in spirometry, lung diffusion capacity, CPET, VO <sub>2</sub> max, or VCO <sub>2</sub> max were found between the groups.                                                     |
| Mack et al. (2010) <sup>24</sup>     | Cross-sectional study                 | CD = 479, UC = 637<br>Statistics on disease activity were not reported                           | Canada  | PA during leisure time was monitored using 21 activities listed in the PA monitor questionnaire. Then, PA was categorized into inactive, moderately active, and active categories.                                                                                                                                                                                                                                                                                                                                                                                                                                                                                                     | Participants with CD (58%) and UC (53.6%) were both engaged in insufficient PA levels. Walking, gardening, swimming, and bicycling were the most commonly reported PAs.                     |
| McNelly et al. (2016) <sup>40</sup>  | Pilot RCT with 2 × 2 factorial design | Adults with IBD patients in remission (n = 52)                                                   | UK      | Exercise advice and omega 3 supplement × 12 weeks. Each patient had a consultation with the researchers and an exercise trainer for 15 minutes on week 1. Patients were instructed to increase PA to >30% based on a personalized goal and to document the details of their achievements in a diary. Patients were helped with goal setting each week for 12 weeks to address exercise barriers. For less active individuals, swimming, walking and simple gym routines were advised; those already engaged in exercise were advised to extend their activities. Fatigue was measured by IBD-F. QOL was measured by IBDQ and EuroQOL. Anxiety and depression were measured using HADS. | ↓ Fatigue scores in those who received exercise advice compared to those who received the exercise placebo. No change in anxiety, depression, or QOL.                                       |

(Continued to the next page)

Supplementary Table 1. Continued

| Author (year)                               | Study type            | Sample & settings                                                                                                           | Country            | Methods                                                                                                                                                                                                                                                                                                                       | Main findings                                                                                                                                                                                                                                                                                                                            |
|---------------------------------------------|-----------------------|-----------------------------------------------------------------------------------------------------------------------------|--------------------|-------------------------------------------------------------------------------------------------------------------------------------------------------------------------------------------------------------------------------------------------------------------------------------------------------------------------------|------------------------------------------------------------------------------------------------------------------------------------------------------------------------------------------------------------------------------------------------------------------------------------------------------------------------------------------|
| Nathan et al. (2013) <sup>29</sup>          | Case series study     | CD = 10, UC = 1<br>Statistics on disease activity were not reported                                                         | UK                 | Exercise was measured using GLTQ.                                                                                                                                                                                                                                                                                             | Participants were primarily engaged in low intensity exercise.<br>Participants engaged in walking, running, swimming, cycling, karate, and yoga.<br>Participants reported no advice from health care providers regarding exercise.                                                                                                       |
| Ng et al. (2015) <sup>25</sup>              | Case control study    | CD = 186, UC = 256, control = 940<br>Statistics on disease activity were not reported                                       | Asia and Australia | The IOIBD questionnaire with 87 questions on environmental factors was used.                                                                                                                                                                                                                                                  | Daily exercise lowered the risk of development of CD.                                                                                                                                                                                                                                                                                    |
| Ng et al. (2007) <sup>31</sup>              | Pilot RCT             | Adults with CD<br>Intervention = 16, control = 16<br>Participants with CD in remission or mild disease activity             | Canada             | The intervention group completed low intensity walking (unsupervised) × 30 minutes' × 3 times/week for 3 months. Each participant wore a pedometer and heart monitor during exercise.<br>All participants completed IPAQ, IBDQ, the IBD stress index, and HBI before and after the intervention.                              | Statistically significant improvement in QOL, disease activity, and stress scores between the participants of the walking program and control groups ( $P < 0.05$ ).                                                                                                                                                                     |
| de Souza Tajiri et al. (2014) <sup>26</sup> | Pilot study           | 148 Female IBD patients with quadriceps weakness<br>Statistics on disease activity were not reported                        | Brazil             | Offered progressive quadriceps resistance training 2 times/week × 8 weeks.<br>Quadriceps strength and QOL (using IBDQ) were measured at baseline and post exercise.                                                                                                                                                           | Improvement in QOL and quadriceps strength ( $P < 0.0001$ ) noted between baseline and post exercise.                                                                                                                                                                                                                                    |
| Taylor et al. (2018) <sup>27</sup>          | Cross-sectional study | Adults with IBD (n = 242)<br>60% had IBD in remission and 40% had active IBD                                                | USA                | Measured PA using IPAQ; vigorous intensity, moderate intensity, walking, and sitting were recorded. The sum of moderate to vigorous PA was computed to calculate MVPA.<br>QOL was measured using SF-36.                                                                                                                       | ↑ QOL with ↑ volumes of MVPA (> 150 min/week, $P < 0.001$ ) and ↑ walking (> 60 min/week, $P < 0.01$ ).                                                                                                                                                                                                                                  |
| Tew et al. (2016) <sup>28</sup>             | Cross-sectional study | CD = 446, UC = 413<br>Disease activity varied from remission to mild, moderate and severe disease<br>Online data collection | UK                 | PA was elicited using IPAQ.<br>Anxiety and depression was measured using HADS.<br>Fatigue was measured using the IBD-F.                                                                                                                                                                                                       | Walking was the most common PA reported.<br>Abdominal pain, fatigue, joint pain, active disease, and ↑ bowel urgency limited PA engagement.<br>An association noted between PA, depression, disease activity, and exercise barriers scores ( $P < 0.01$ ) in adults with CD and PA, depression and age ( $P < 0.01$ ) in adults with UC. |
| Tew et al. (2019) <sup>36</sup>             | Pilot RCT             | CD in remission or mildly active = 36<br>Three groups:<br>1. HIIT (n = 13)<br>2. MICT (n = 12)<br>3. Control (n = 11)       | UK                 | Supervised HIIT and MICT were provided to participants using the leg cycle for 12 weeks.<br>Cardiorespiratory fitness was measured using $VO_2$ max.<br>Disease activity was measured by CDAI.<br>Fatigue was measured by IBD-F.<br>QOL was measured by IBDQ and EuroQOL.<br>Anxiety and depression were measured using HADS. | Mean ↑ in peak oxygen uptake ( $VO_2$ max) in the HIIT group followed by the MICT group compared to the control group.<br>↓ In fatigue, anxiety and depression in the HIIT, MICT and control groups<br>↑ QOL only in the MICT group.                                                                                                     |

(Continued to the next page)

Supplementary Table 1. Continued

| Author (year)                                  | Study type              | Sample & settings                                                                        | Country   | Methods                                                                                                                                                                                                                                                                                                                                                                                                                                          | Main findings                                                                                                                                                                                                                                        |
|------------------------------------------------|-------------------------|------------------------------------------------------------------------------------------|-----------|--------------------------------------------------------------------------------------------------------------------------------------------------------------------------------------------------------------------------------------------------------------------------------------------------------------------------------------------------------------------------------------------------------------------------------------------------|------------------------------------------------------------------------------------------------------------------------------------------------------------------------------------------------------------------------------------------------------|
| van Langenberg and Gibson (2014) <sup>41</sup> | Longitudinal assessment | CD = 86                                                                                  | Australia | Fatigue was measured using FIS. Participants were asked about the introduction of vitamin B <sub>12</sub> , antidepressants, initiation of regular exercise, and dietary modifications.                                                                                                                                                                                                                                                          | The commencement of a regular exercise program resulted in improvement in physical fatigue ( $P=0.04$ ) in the follow-up assessment.                                                                                                                 |
| van Langenberg et al. (2015) <sup>38</sup>     | Cross-sectional study   | CD = 48, healthy controls = 30                                                           | Australia | Each participant (CD) wore an accelerometer around the waist for 24 hours/day (including sleep but excluding bathing, swimming, and showering) for 7 consecutive days. Sleep was measured using PSQI. Anxiety and depression were measured using HADS. Fatigue was measured using FIS. Disease activity was determined by HBI $\geq 5$ , CRP $>3$ mg/L, and fecal calprotectin $>100$ $\mu\text{g/g}$ .                                          | Impaired PA parameters among the CD group compared to control ( $P<0.01$ ). Lower vitamin D <sub>3</sub> , indication of systemic inflammation (CRP $>3$ ), longer CD duration, and presence of fatigue were independently associated with lower PA. |
| Wiestler et al. (2019) <sup>39</sup>           | Cross-sectional study   | Active CD = 24, CD in remission = 25<br>Active UC = 15, UC in remission = 26             | Germany   | Each participant wore a biaxial accelerometer around the upper arm for 24 hours/day (including sleep but excluding swimming and showering) for 7 consecutive days. QOL was measured by IBDQ. Disease activity was measured by HBI or SCCAI.                                                                                                                                                                                                      | Accelerometrically determined PA was significantly associated with QOL and disease activity. PA was higher among CD and UC participants in remission.                                                                                                |
| Zaltman et al. (2013) <sup>35</sup>            | Case control study      | UC patients Cases = 23, control = 23<br>Statistics on disease activity were not reported | Brazil    | Body composition (fat free mass and fat mass) was evaluated by bioelectrical impedance analysis. Muscle strength was assessed by evaluating the non-dominant handgrip strength using a hand dynamometer. A digital chronometer measured lower extremity functional performance (sit up test to check the ability to rise from a chair and gait speed to check walking velocity with a trainer). The Baecke questionnaire was used to measure PA. | No difference on body composition between the cases and the controls. $\downarrow$ Lower limb strength and $\downarrow$ muscle strength among females with UC compared to the controls. PA had a protective effect against a reduced gait speed.     |

IBD, inflammatory bowel disease; IBD-F, IBD Fatigue scale; PA, physical activity; IPAQ, International Physical Activity Questionnaire; BFI, brief fatigue inventory; MFI, multifactorial fatigue inventory; CD, Crohn's disease; QOL, quality of life; IBDQ, Inflammatory Bowel Disease Questionnaire; SF-36, Short Form 36; UC, ulcerative colitis; GLTQ, Godin Leisure Time Questionnaire; DEXA, dual energy X-ray absorptiometry; VO<sub>2</sub> max, maximum oxygen uptake; CRP, C-reactive protein; PSS, perceived stress scale; HBI, Harvey-Bradshaw index; FACIT, functional assessment of chronic illness therapy; GLTA, Godin leisure time activity index; sCDAI, short Crohn's Disease Activity Index; SCCAI, simple clinical colitis activity index; MET, metabolic equivalent task; RCT, randomized control trial; VCO<sub>2</sub>, maximum CO<sub>2</sub> production; CPET, cardiopulmonary exercise test; HADS, hospital anxiety and depression scale; IOIBD, International Organization of IBD; MVPA, moderate to vigorous physical activity; HIIT, high-intensity interval training; MICT, moderate-intensity continuous training; FIS, fatigue impact scale; PSQI, Pittsburg sleep quality index;  $\uparrow$ , increased;  $\downarrow$ , decreased.
